# Supplementary material
Source: publisher site journal article supplement (https://www.dovepress.com/article/236423)

Supplementary Figure S1: Overall pooling in analyzed studies showing 12-month changes in visual acuity. Forest plot.

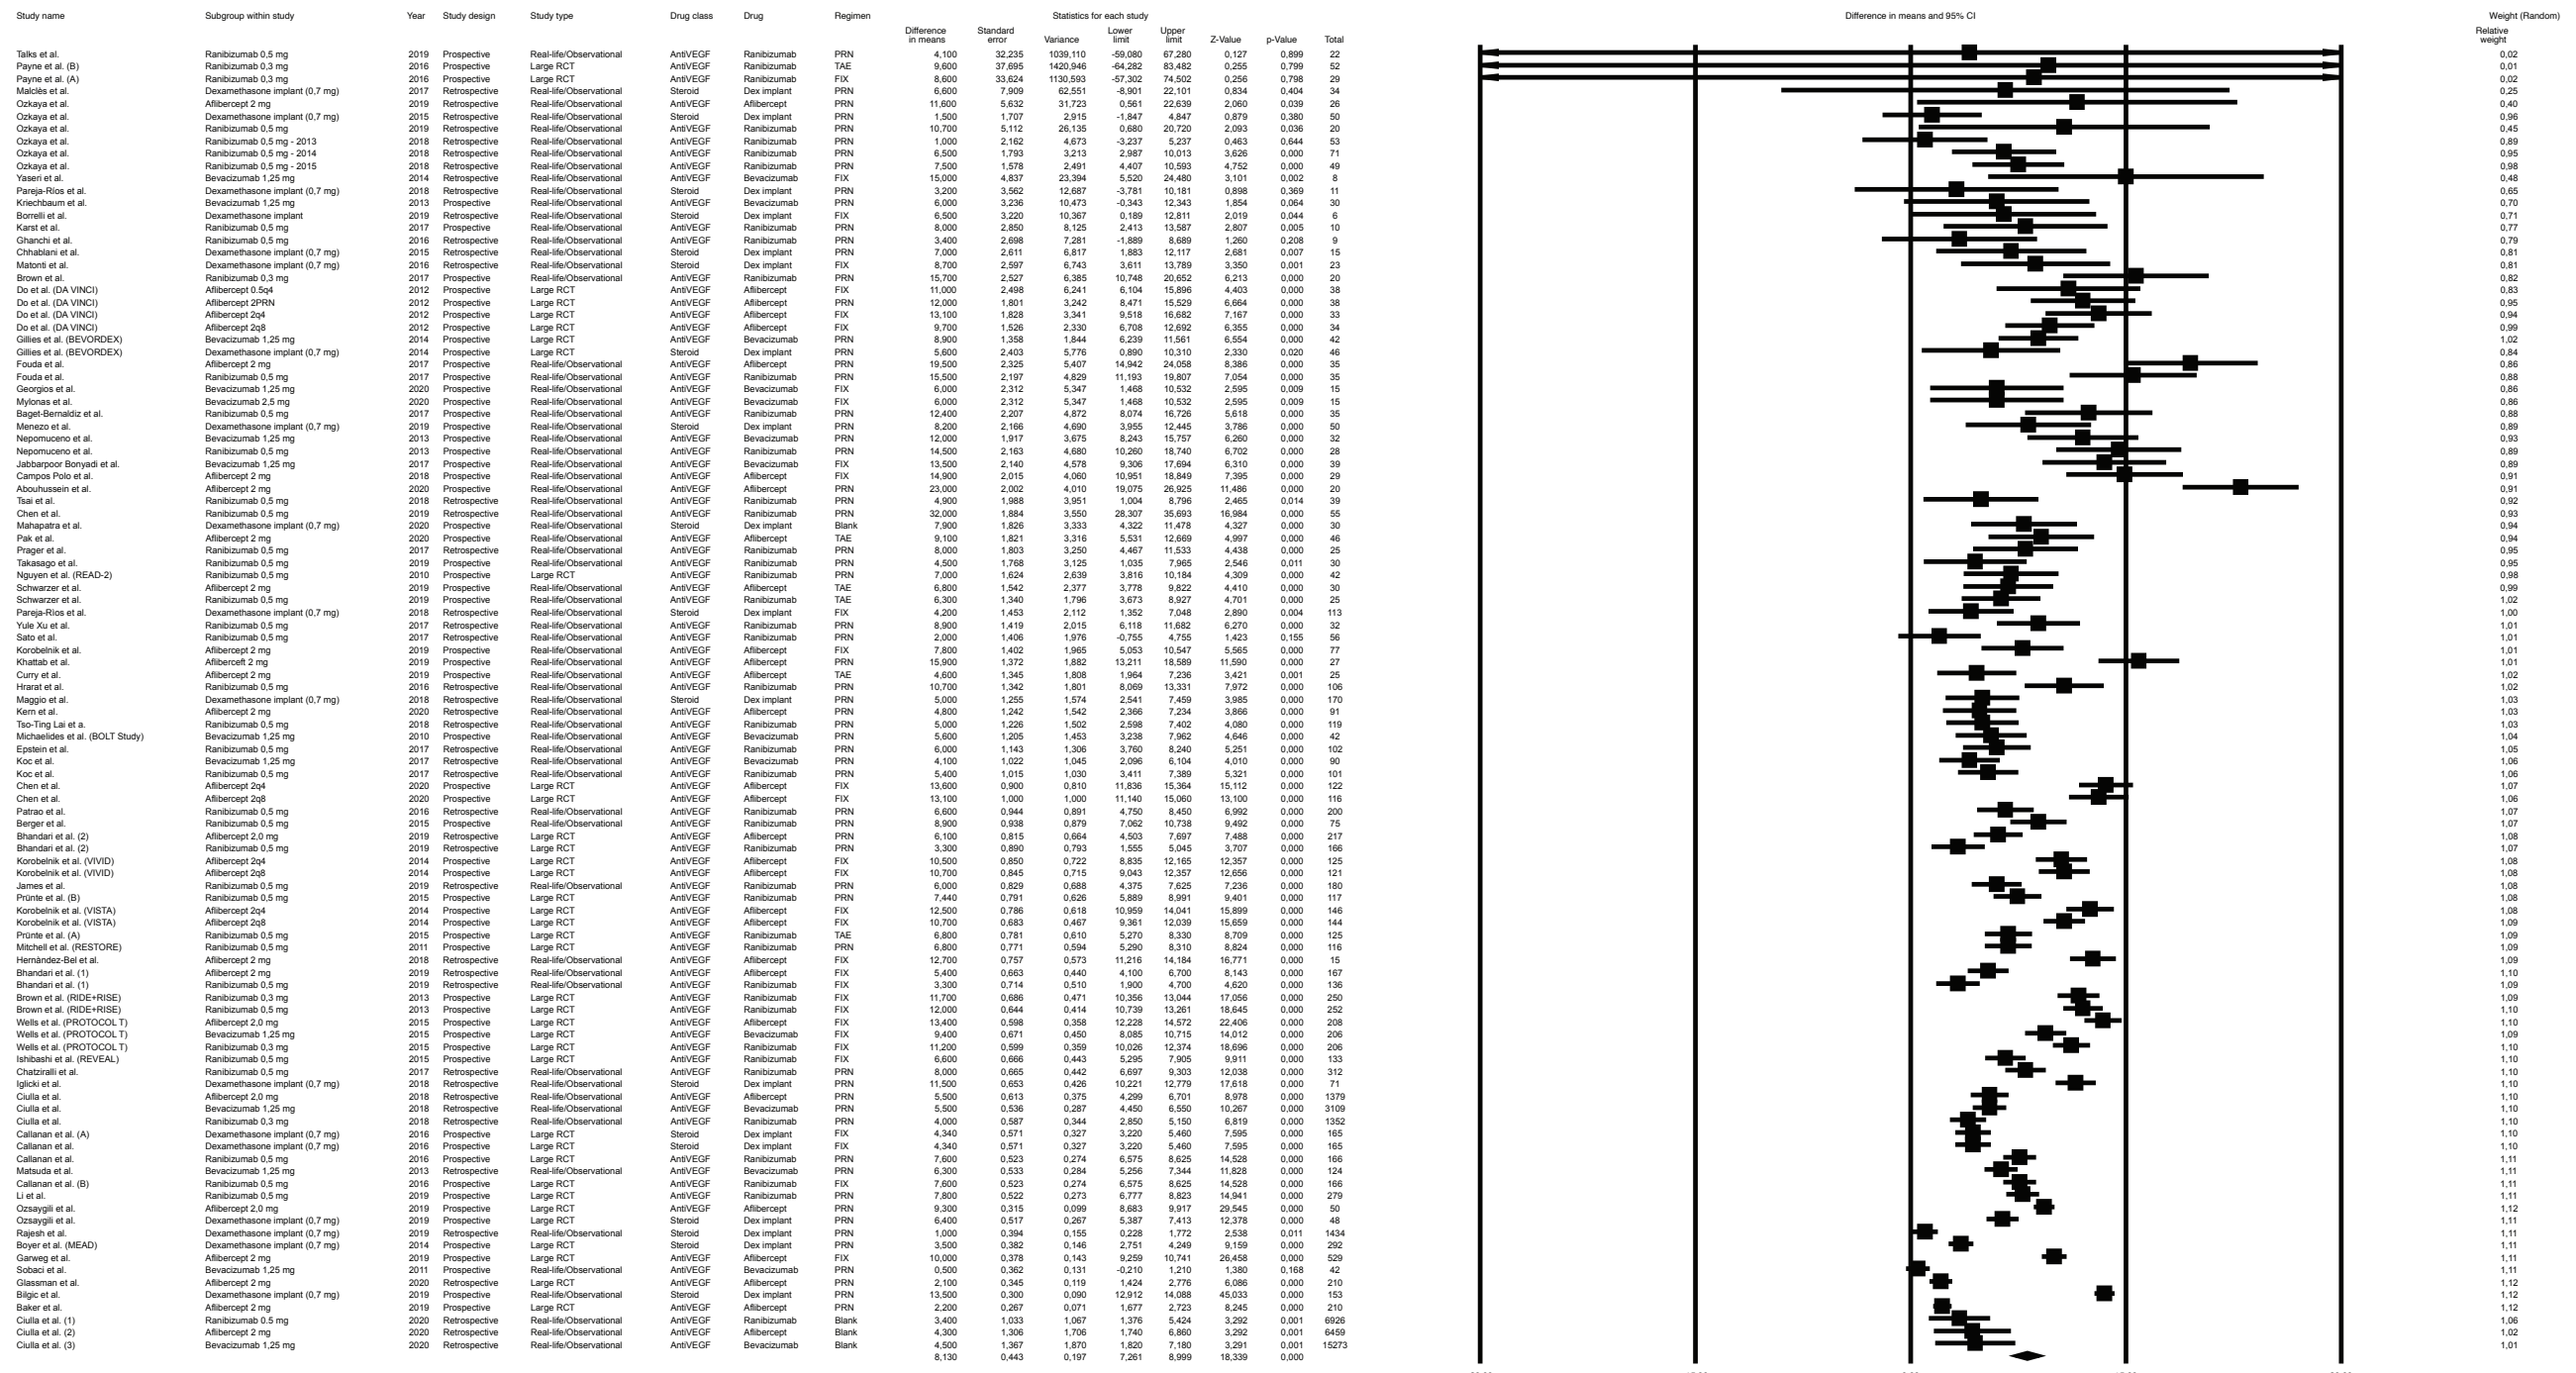

Supplement: Supplementary file 1 [file get_supplementary_file.php]
